# Supplementary material
Source: MDPI journal article supplement (https://www.mdpi.com/1999-4907/13/11/1819)
Supplement: s1 [file s1 › forests-1975908-Supplementary material.pdf]

## Supplementary material

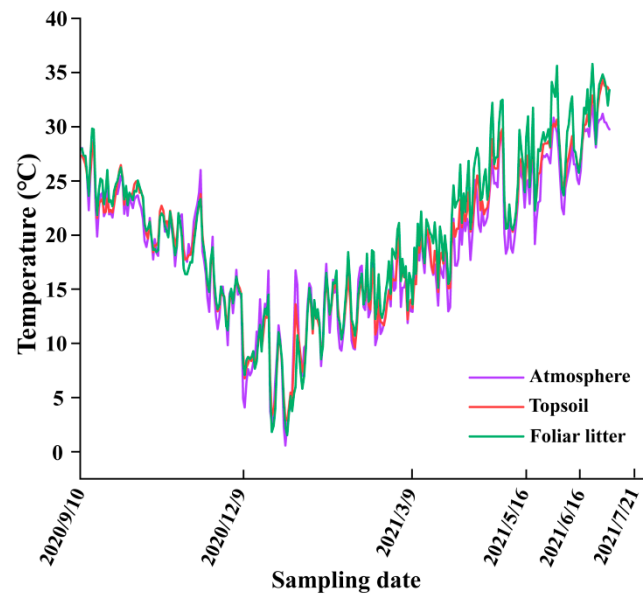

**Figure S1.** The daily mean temperature dynamics of the atmosphere, topsoil, and foliar litter in the experimental area of the litter incubation experiment from September 10, 2020, to July 21, 2021.

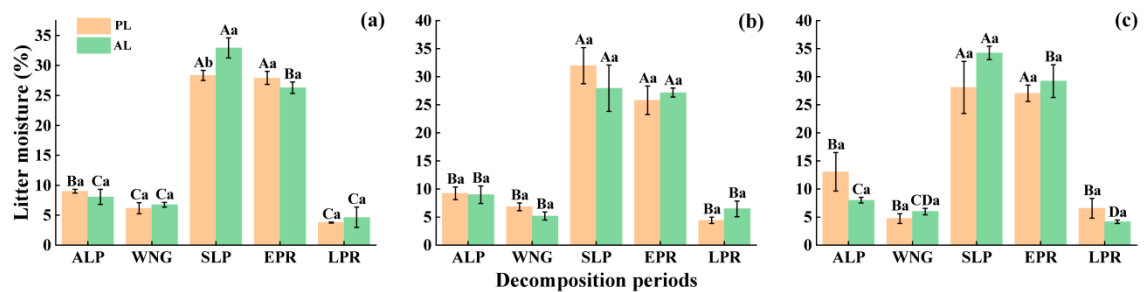

**Figure S2.** The moisture dynamics of goldenrain tree (a), camphor tree (b), and weeping willow tree (c) foliar litter at five key decomposition periods. ALP, WNG, SLP, EPR, and LPR indicate the autumn litter peak period, winter nongrowing season, spring litter peak period, early plum-rainy season, and late plum-rainy season, respectively. PL and AL indicate physiological and abnormal litter, respectively. Different capital letters indicate significant differences between different key periods ( $P < 0.05$ ). Different lowercase letters indicate significant differences between different sources of foliar litter ( $P < 0.05$ ).
